# Supplementary material for: Sea-urchin-like nickel–cobalt phosphide/phosphate composites as advanced battery materials for hybrid supercapacitors
Source: Royal Society of Chemistry journal article supplement (doi:10.1039/c8ta11189h), 2019-01-01
Supplement: c8ta11189h1.pdf [file c8ta11189h1.pdf]

## Electronic Supplementary Information

### Sea-urchin-like nickel–cobalt phosphide/phosphate composites as advanced battery materials for hybrid supercapacitors

Hai Chao Chen,<sup>\*,a</sup> Sipeng Jiang,<sup>a</sup> Binghui Xu,<sup>a</sup> Chenghao Huang,<sup>a</sup> Yuzhen Hu,<sup>a</sup> Yanliang Qin,<sup>a</sup> Maoxia He<sup>b</sup> and Haijie Cao<sup>\*,a</sup>

<sup>a</sup>*Institute of Materials for Energy and Environment, School of Materials Science and Engineering, Qingdao University, Qingdao 266071, P. R. China.*

<sup>b</sup>*Environment Research Institute, Shandong University, Jinan, 250100, P. R. China.*

\*Corresponding authors. E-mail: chenhchust@126.com, chenhc@qdu.edu.cn (H. C. Chen); caohj1582@hotmail.com (H. Cao)

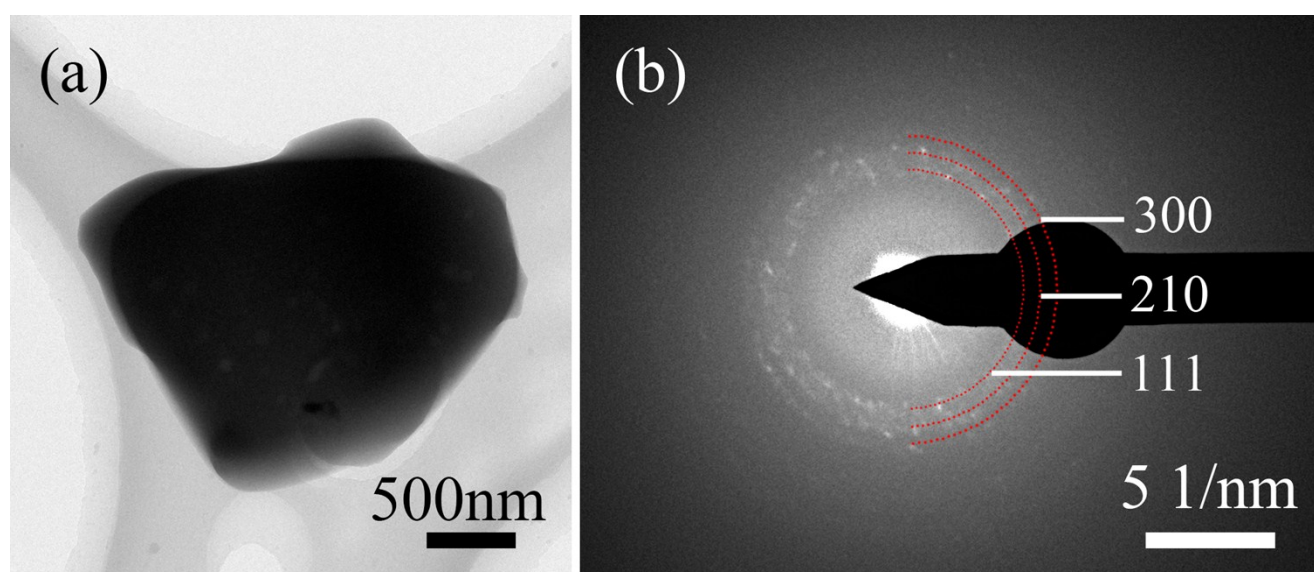

**Fig. S1** (a) TEM image and (b) selected area electron diffraction pattern of the Ni–P/PO<sub>x</sub>. The diffraction rings in the selected area electron diffraction pattern can be assigned to the 111, 210 and 300 crystal plane systems of Ni<sub>2</sub>P.

For the theory calculations, all the calculations were carried out at Materials Studio program based on the density functional theory using the generalized gradient approximation (GGA) and following the Perdew-Bueke- Ernzerhof scheme (PBE) for the exchange–correlation potential. An energy cutoff of 350 eV is used for plane wave expansion. The energy and self-consistent field tolerances were  $5.0 \times 10^{-6}$  eV per atom and  $5.0 \times 10^{-7}$  eV per atom, respectively. The  $5 \times 5 \times 8$  Monkhorst-Pack grid of  $k$ -points was used. The optimized lattice parameters of  $\text{Ni}_2\text{P}$  are  $5.869 \times 5.869 \times 3.383$  Å which is in good agreement with the experimental values ( $5.867 \times 5.867 \times 3.389$  Å).<sup>S1</sup>

Fig. S2 shows the colored maps of the electric density and its difference of a  $2 \times 2 \times 2$  supercell of  $\text{Ni}_2\text{P}$  bulk. The bulk compositions of  $\text{Ni}_2\text{P}$  is  $\text{Ni}_6\text{P}_3$ . Larger bond lengths are observed for P– $\text{Ni}_\text{B}$  bonds (2.348 Å) compared to the P– $\text{Ni}_\text{A}$  bonds (2.265 Å) in  $\text{Ni}_2\text{P}$  bulk, indicating stronger interaction of P atoms with the  $\text{Ni}_\text{A}$  than  $\text{Ni}_\text{B}$ . The electron density as well as its difference maps shown in Fig. S2 demonstrate that  $\text{Ni}_\text{A}$  has stronger covalent properties with P than  $\text{Ni}_\text{B}$ . It is found that the electrons slightly drift from the P  $3p$  orbitals to Ni  $3d$  orbitals (especially  $\text{Ni}_\text{A}$ ) by analysis of the Hirshfeld charge.

As shown in Table S1, the volumes of bulks are slightly reduced when Ni ions are replaced by Co ions. Besides,  $\text{Ni}_\text{B}\text{Co}_\text{A}\text{P}$  has a lower cohesive energy (–5.31 eV) than  $\text{Ni}_\text{A}\text{Co}_\text{B}\text{P}$  (–5.22 eV), indicating that  $\text{Ni}_\text{B}\text{Co}_\text{A}\text{P}$  is more stable than  $\text{Ni}_\text{A}\text{Co}_\text{B}\text{P}$ . The formation energies of  $\text{Ni}_\text{B}\text{Co}_\text{A}\text{P}$  and  $\text{Ni}_\text{A}\text{Co}_\text{B}\text{P}$  are –1.00 and –0.24 eV, respectively. The result implies that cobalt ions are prior to replace the  $\text{Ni}_\text{A}$  ions.

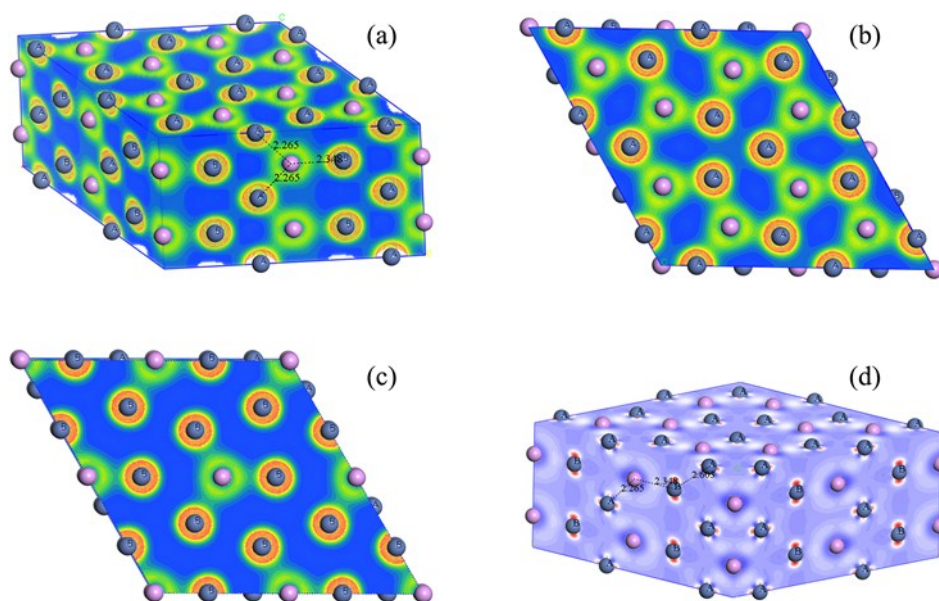

**Fig. S2** Maps of electron densities for the (a)  $\text{Ni}_2\text{P}$  ( $2 \times 2 \times 2$ ) bulks, (b)  $\text{Ni}_\text{A}\text{P}$  plane and (c)  $\text{Ni}_\text{B}\text{P}$  plane. (d) The electron density difference of  $\text{Ni}_2\text{P}$  ( $2 \times 2 \times 2$ ) bulks.

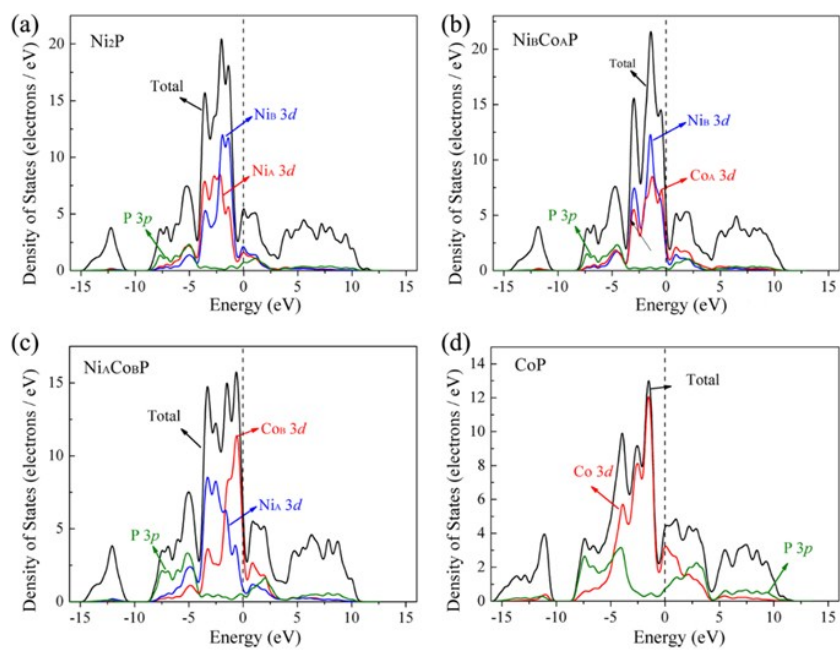

**Fig. S3** Total and partial density of states of (a)  $\text{Ni}_2\text{P}$ , (b)  $\text{Ni}_\text{B}\text{Co}_\text{A}\text{P}$ , (c)  $\text{Ni}_\text{A}\text{Co}_\text{B}\text{P}$  and (d)  $\text{CoP}$  bulks.

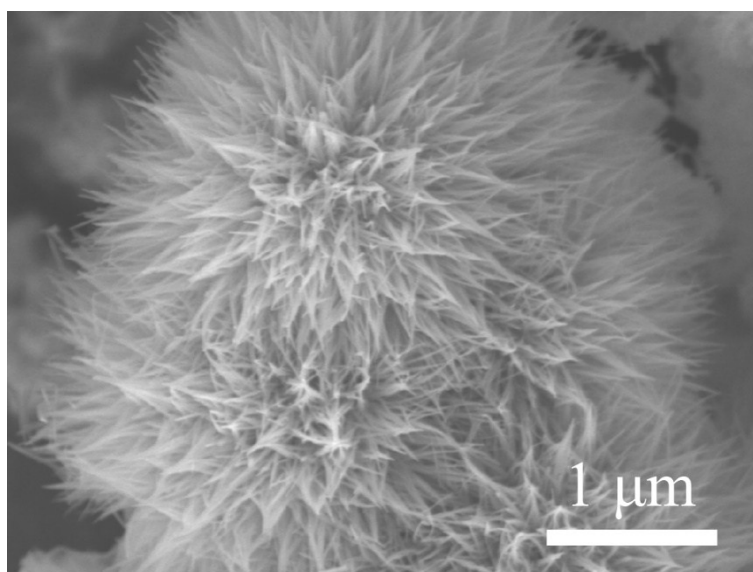

**Fig. S4** SEM image of the Ni–Co oxide with a Ni to Co ratio of 1:1.

**Table S1** Detailed parameters of Ni<sub>2</sub>P, Ni<sub>B</sub>Co<sub>A</sub>P, Ni<sub>A</sub>Co<sub>B</sub>P and CoP bulks.

|                                                    | Ni <sub>2</sub> P              | Ni <sub>B</sub> Co <sub>A</sub> P | Ni <sub>A</sub> Co <sub>B</sub> P | CoP                            |
|----------------------------------------------------|--------------------------------|-----------------------------------|-----------------------------------|--------------------------------|
| Composition                                        | Ni <sub>6</sub> P <sub>3</sub> | Ni <sub>3</sub> Co <sub>3</sub> P | Ni <sub>3</sub> Co <sub>3</sub> P | Co <sub>4</sub> P <sub>4</sub> |
| Point group                                        | P-62M                          | P-62M                             | P-62M                             | PNMA                           |
| Lattice parameters (Å)                             | 5.87×5.87×3.38                 | 5.82×5.82*3.33                    | 5.81×5.81×3.35                    | 5.05×3.27×5.53                 |
| Volume                                             | 116.528                        | 112.824                           | 112.826                           | 91.369                         |
| N <sub>e</sub> in -1~0 eV                          | 4.2965                         | 12.4002                           | 12.6238                           | 3.2012                         |
| N <sub>e</sub> in -0.5~0 eV                        | 2.0381                         | 5.2224                            | 5.3252                            | 1.6624                         |
| Number of electrons around Fermi level (-0.5~0 eV) |                                |                                   |                                   |                                |
| Ni-3d                                              | 1.4489                         | 2.0294                            | 0.8670                            |                                |
| Co-3d                                              |                                | 2.7079                            | 3.9974                            | 1.2032                         |
| P-3p                                               | 0.3278                         | 0.2065                            | 0.2408                            | 0.2426                         |

## Reference

S1 R. Fruchart, A. Roger, J. P. Senateur. Crystallographic and Magnetic Properties of Solid Solutions of the Phosphides M<sub>2</sub>P, M = Cr, Mn, Fe, Co, and Ni. *J. Appl. Phys.*, 1969, **40**, 1250–1257.
